# Supplementary material for: Administration of BMSCs with Muscone in Rats with Gentamicin-Induced AKI Improves Their Therapeutic Efficacy
Source: PubMed Central journal article supplement (PMC4019657; doi:10.1371/journal.pone.0097123), 2014-05-13

Figure S1

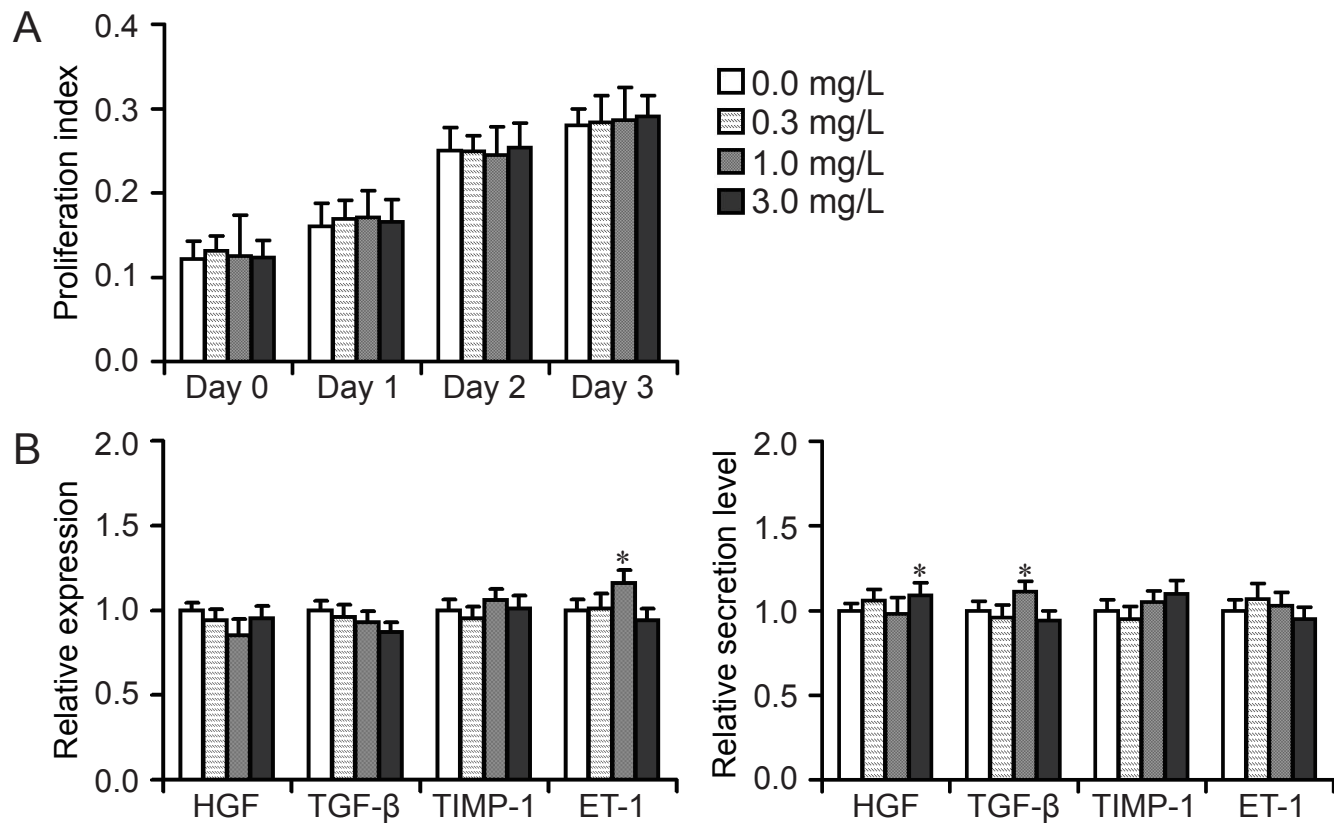

Supplement: pone.0097123.s001.pdf [file pone.0097123.s001.pdf]
