# Supplementary material for: Administration of BMSCs with Muscone in Rats with Gentamicin-Induced AKI Improves Their Therapeutic Efficacy
Source: PubMed Central journal article supplement (PMC4019657; doi:10.1371/journal.pone.0097123), 2014-05-13
Supplement: pone.0097123.s005.pdf [file pone.0097123.s005.pdf]

Table S1. The absolute values in proliferation indexes of each group

| Time  | 0.0 mg/L    | 0.3 mg/L    | 1.0 mg/L    | 3.0 mg/L    |
|-------|-------------|-------------|-------------|-------------|
| Day 0 | 0.202±0.041 | 0.210±0.042 | 0.223±0.031 | 0.214±0.043 |
| Day 1 | 0.321±0.053 | 0.378±0.050 | 0.441±0.040 | 0.433±0.051 |
| Day 2 | 0.521±0.051 | 0.602±0.043 | 0.656±0.043 | 0.667±0.055 |
| Day 3 | 0.600±0.034 | 0.667±0.051 | 0.703±0.035 | 0.711±0.043 |
