# Supplementary material for: Administration of BMSCs with Muscone in Rats with Gentamicin-Induced AKI Improves Their Therapeutic Efficacy
Source: PubMed Central journal article supplement (PMC4019657; doi:10.1371/journal.pone.0097123), 2014-05-13
Supplement: pone.0097123.s006.pdf [file pone.0097123.s006.pdf]

Table 2. Urinary creatinine during the therapy process

| Group               | Urinary Creatinine (mM) |         |
|---------------------|-------------------------|---------|
|                     | I                       | II      |
| normal group        | 3.6±0.5                 | 3.5±0.7 |
| model group         | 2.1±0.7                 | 2.3±0.4 |
| positive drug group |                         | 3.0±0.6 |
| muscone group       |                         | 2.8±0.7 |
| BMSCs group         |                         | 3.1±0.6 |
| combined group      |                         | 3.2±0.4 |
